# Supplementary material for: Identification of survivin as a promising target for the immunotherapy of adult B-cell acute lymphoblastic leukemia
Source: PubMed Central journal article supplement (PMC5790505; doi:10.18632/oncotarget.23380), 2017-12-17
Supplement: oncotarget-09-3853-s001.pdf [file oncotarget-09-3853-s001.pdf]

## Identification of survivin as a promising target for the immunotherapy of adult B-cell acute lymphoblastic leukaemia

### SUPPLEMENTARY MATERIALS

**Supplementary Table 1: Cell lines used to demonstrate antigen expression (positive and negative controls) and optimise assays**

| Cell line   | Disease type                                 | Reference            | Antigens expressed <sup>†</sup>     | Method                    | Reference  |
|-------------|----------------------------------------------|----------------------|-------------------------------------|---------------------------|------------|
| 697         | Childhood ALL                                | [48]                 | Common ALL antigens & HLA-DR<br>END | Flow cytometry            | [49]       |
| ARH77       | Non-Burkitt Lymphoblastoid cell line/myeloma | [50]                 | -                                   | -                         | -          |
| HeLa        | Cervical cancer                              | [51]                 | PASD1                               | RT-PCR                    | [27]       |
| H1299       | Lung cancer                                  | [52]                 | PASD1                               | RT-PCR, qPCR, ICC         | [27],[53]  |
| Jurkats     | T-cell leukaemia                             | -                    | PASD1                               | RT-PCR                    | [27]       |
| K562        | Chronic myeloid leukaemia                    | [54]                 | HAGE                                | RT-PCR                    | [32]       |
|             |                                              |                      | SSX2IP                              | RT-PCR, ICC               | [27], [55] |
|             |                                              |                      | SSX2                                | RT-PCR                    | [56]       |
|             |                                              |                      | PASD1                               | RT-PCR, qPCR, ICC         | [27], [45] |
|             |                                              |                      | WT1                                 | RT-PCR                    | [57]       |
|             | Survivin                                     | RT-PCR, Western Blot | [58]                                |                           |            |
| KG1         | Erythroleukaemia                             | [59]                 | *PASD1 and SSX2IP                   | RT-PCR                    | [27]       |
| KYO-1       | Chronic myeloid leukaemia                    | [60]                 |                                     |                           |            |
| MDA-MB-231* | Breast Adenocarcinoma                        | [61]                 | END                                 | RT-PCR, Western blot, ICC | [13]       |
| NB4         | Acute promyelocytic leukaemia                | [62]                 | Survivin                            | RT-PCR                    | [63]       |
| OCI-LY3*    | Non-Hodgkin's lymphoma                       | [64]                 | PASD1                               | ICC                       | [65]       |
| P39         | Myelomonocytoid                              | [66]                 | HAGE                                | RT-PCR                    | [32]       |
| SW480       | Colorectal cancer                            | [67]                 | WT1                                 |                           | [68]       |
|             |                                              |                      | PASD1                               | cDNA hybridisation        | [69]       |
| U266        | Multiple Myeloma                             | [70]                 | -                                   | -                         | -          |
| U937        | Lymphoma                                     | -                    | HAGE                                | RT-PCR                    | [32]       |
| VLB         | Leukaemic lymphoblasts                       | [71]                 | HAGE                                | RT-PCR                    | [32]       |
|             |                                              |                      | SSX2IP                              | RT-PCR                    | [27]       |

\*- used only as controls for ICC analysis; †- that were also investigated in patients in this study; \* - negative control for PASD1 and SSX2IP expression.

**Supplementary Table 2: Antibodies used for ICC**

| <b>Antibody specificity</b>                       | <b>Validation</b> | <b>Isotype</b>                | <b>Manufacturer<br/>/catalogue number</b> | <b>Species</b>    | <b>Dilution</b> |
|---------------------------------------------------|-------------------|-------------------------------|-------------------------------------------|-------------------|-----------------|
| <b>Primary antibodies</b>                         |                   |                               |                                           |                   |                 |
| Actin                                             | -                 | Monoclonal, IgG <sub>1</sub>  | Abcam/ab3280                              | Mouse anti-human  | 1/100           |
| Isotype control                                   | -                 | Monoclonal, IgG <sub>1</sub>  | Abcam/ab18443                             | Mouse anti-human  | 1/250           |
| Isotype control                                   | -                 | Monoclonal, IgG               | Abcam/ab172730                            | Rabbit anti-human | 1/250           |
| pSSX2(N)                                          | -                 | Polyclonal, IgG               | Abcam/ab182361                            | Rabbit anti-human | 1/100           |
| WT1                                               | [72]              | Monoclonal, IgG <sub>2a</sub> | Abcam/ab89901                             | Rabbit anti-human | 1/50            |
| SSX2IP                                            | -                 | Polyclonal, IgG               | Abcam/ab10256                             | Goat anti-human   | 1/100           |
| Survivin                                          | [73]              | Monoclonal                    | Abcam/ab76424                             | Rabbit anti-human | 1/100           |
| PASD1-1: reacts with<br>PASD1a and PASD1b<br>[65] | [65]              | N/A                           | Banham/Pulford<br>University of Oxford    | Mouse anti-human  | 1/250           |
| Interlinking Ab for<br>SSX2IP (GT175)             | -                 | N/A                           | Banham/Pulford<br>University of Oxford    | Mouse anti-goat   | 1/100           |
| <b>Secondary antibodies</b>                       |                   |                               |                                           |                   |                 |
| Anti-mouse                                        | -                 | Polyclonal, Ig                | Dako#/K4007                               | Anti-mouse        | N/A             |
| Anti-rabbit                                       | -                 | Polyclonal, Ig                | Dako#/K4011                               | Anti-rabbit       | N/A             |

N/A: not applicable. #: Part of the Dako Envision kit.
